# Supplementary material for: Optimization of Cyanine Dye Stability and Analysis of FRET Interaction on DNA Microarrays
Source: PubMed Central journal article supplement (PMC5192427; doi:10.3390/biology5040047), 2016-11-30
Supplement: biology-05-00047-s002.pdf [file biology-05-00047-s002.pdf]

# Supplementary Materials: Optimization of Cyanine Dye Stability and Analysis of FRET Interaction on DNA Microarrays

Marcel von der Haar, Christopher Heuer, Martin Pähler, Patrick Lindner, Thomas Scheper and Frank Stahl

**Table S1.** Sets of Genes for which oligos were designed as used in the 96 gene, two-array experiment and the 24 gene, three-array experiment. Selected oligos are marked with an x for each experiment.

| Gene                                                                                 | 96 Gene Two-Array Experiment | 24 Gene Three-Array Experiment |
|--------------------------------------------------------------------------------------|------------------------------|--------------------------------|
| 16S pseudouridylate 516 synthase; rsuA                                               | x                            |                                |
| 2-oxoglutarate dehydrogenase (decarboxylase component); sucA                         | x                            | x                              |
| 2-oxoglutarate dehydrogenase (dihydrolipoyltranssuccinase E2 component); sucB        | x                            |                                |
| 30S ribosomal subunit protein S16; rpsP                                              | x                            |                                |
| 30S ribosomal subunit protein S7, initiates assembly; rpsG                           | x                            |                                |
| 50S ribosomal subunit protein L10; rplJ                                              | x                            | x                              |
| 50S ribosomal subunit protein L18; rplR                                              | x                            |                                |
| 50S ribosomal subunit protein L2; rplB                                               | x                            |                                |
| 50S ribosomal subunit protein L23; rplW                                              | x                            | x                              |
| 50S ribosomal subunit protein L3; rplC                                               | x                            |                                |
| 50S ribosomal subunit protein L30; rpmD                                              | x                            |                                |
| 50S ribosomal subunit protein L4, regulates expression of S10 operon; rplD           | x                            |                                |
| Arabidopsis Control Oligonucleotide                                                  | x                            |                                |
| arginine 3rd transport system permease protein; artQ                                 | x                            | x                              |
| ATP-binding component of sn-glycerol 3-phosphate transport system; ugpC              | x                            |                                |
| bifunctional pyrimidine deaminase/reductase in pathway of riboflavin synthesis; ribD | x                            |                                |
| cell division protein; ftsJ                                                          | x                            |                                |
| chaperone Hsp70; DNA biosynthesis; autoregulated heat shock proteins; dnaK           | x                            |                                |
| chaperone Hsp70; DNA biosynthesis; autoregulated heat shock proteins; dnaK           | x                            |                                |
| chaperone with DnaK; heat shock protein; dnaJ                                        | x                            |                                |
| coproporphyrinogen III oxidase; hemF                                                 | x                            |                                |
| cytochrome d terminal oxidase, polypeptide subunit I; cydA                           | x                            |                                |
| cytochrome o ubiquinol oxidase subunit I; cyoB                                       | x                            |                                |
| cytochrome o ubiquinol oxidase subunit II; cyoA                                      | x                            | x                              |
| cytochrome o ubiquinol oxidase subunit III; cyoC                                     | x                            |                                |
| delta(2)-isopentenylpyrophosphate tRNA-adenosine transferase; miaA                   | x                            |                                |
| DNA biosynthesis; DNA primase; dnaG                                                  | x                            |                                |
| DNA polymerase III, chi subunit; holC                                                | x                            | x                              |

|                                                                                              |   |   |
|----------------------------------------------------------------------------------------------|---|---|
| DNA-binding, ATP-dependent protease La; heat shock                                           |   |   |
| K-protein; lon                                                                               | x |   |
| D-ribulose-5-phosphate 3-epimerase; rpe                                                      | x |   |
| fermentative D-lactate dehydrogenase, NAD-dependent; ldhA                                    | x |   |
| formate dehydrogenase-O, major subunit; fdoG                                                 | x |   |
| fumarate reductase, anaerobic, membrane anchor polypeptide; frdC                             | x |   |
| fumarate reductase, anaerobic, membrane anchor polypeptide; frdD                             | x |   |
| galactitol-specific enzyme IIA of phosphotransferase system; gatA                            | x |   |
| GroEL, chaperone Hsp60, peptide-dependent ATPase, heat shock protein; mopA                   | x |   |
| GroES, 10 Kd chaperone binds to Hsp60 in pres, Mg-ATP, suppressing its ATPase activity; mopB | x | x |
| GTP-binding export factor binds to signal sequence, GTP and RNA; ffh                         | x | x |
| heat shock protein hslJ; hslJ                                                                | x |   |
| heat shock protein hslVU, ATPase subunit, homologous to chaperones; hslU                     | x |   |
| heat shock protein hslVU, proteasome-related peptidase subunit; hslV                         | x |   |
| heat shock protein, chaperone, member of Hsp70 protein family; hscA                          | x |   |
| heat shock protein, integral membrane protein; htpX                                          | x |   |
| heat shock protein; clpB                                                                     | x |   |
| heat shock protein; ibpA                                                                     | x |   |
| heat shock protein; ibpB                                                                     | x |   |
| host factor I for bacteriophage Q beta replication, a growth-related protein; hfq            | x |   |
| internal control                                                                             | x | x |
| IS186 hypothetical protein; yi81_1                                                           | x |   |
| isocitrate dehydrogenase, specific for NADP+; icdA                                           | x |   |
| mechanosensitive channel; mscL                                                               | x |   |
| membrane-bound ATP synthase, F1 sector, alpha-subunit; atpA                                  | x |   |
| membrane-bound ATP synthase, F1 sector, alpha-subunit; atpA                                  | x |   |
| membrane-bound ATP synthase, F1 sector, beta-subunit; atpD                                   | x | x |
| membrane-bound ATP synthase, F1 sector, delta-subunit; atpH                                  | x |   |
| membrane-bound ATP synthase, F1 sector, gamma-subunit; atpG                                  | x | x |
| methylglyoxal synthase; mgsA                                                                 | x | x |
| multiple antibiotic resistance; transcriptional activator of defense systems; marA           | x |   |
| N-acetylglucosamine metabolism; nagD                                                         | x |   |
| NADH dehydrogenase I chain F; nuoF                                                           | x |   |
| NADH dehydrogenase I chain H; nuoH                                                           | x |   |

|                                                                                           |   |   |
|-------------------------------------------------------------------------------------------|---|---|
| NADH dehydrogenase I chain J; nuoJ                                                        | x |   |
| NADH dehydrogenase I chain L; nuoL                                                        | x | x |
| NADH dehydrogenase I chain M; nuoM                                                        | x |   |
| nitrate/nitrite response regulator (sensor NarQ); narP                                    | x |   |
| orf, hypothetical protein; b1541                                                          | x |   |
| orf, hypothetical protein; b1824                                                          | x |   |
| orf, hypothetical protein; b3000                                                          | x | x |
| orf, hypothetical protein; ybgF                                                           | x |   |
| orf, hypothetical protein; yccV                                                           | x | x |
| orf, hypothetical protein; yfjA                                                           | x |   |
| orf, hypothetical protein; yhaL                                                           | x | x |
| orf, hypothetical protein; yhfY                                                           | x |   |
| outer membrane porin protein; locus of qsr prophage;<br>nmpC                              | x | x |
| periplasmic protein involved in the tonb-independent<br>uptake of group A colicins; tolB  | x | x |
| phage lambda replication; host DNA synthesis; heat<br>shock protein; protein repair; grpE | x |   |
| phosphoenolpyruvate carboxykinase; pckA                                                   | x |   |
| probable third cytochrome oxidase, subunit I; appC                                        | x | x |
| PTS enzyme IIAB, mannose-specific; manX                                                   | x |   |
| PTS system, N-acetylglucosamine-specific enzyme<br>IIABC; nagE                            | x |   |
| putative amino acid/amine transport protein; yeaN                                         | x | x |
| putative ATP-binding component of a transport<br>system; ybjZ                             | x |   |
| putative ATP-binding protein in pho regulon; ybeZ                                         | x |   |
| putative EC 2,1 enzymes; ycjX                                                             | x |   |
| putative ligase; yjfG                                                                     | x | x |
| putative oxidoreductase; ydfI                                                             | x |   |
| putative phosphatase; yrfG                                                                | x |   |
| putative tagatose 6-phosphate kinase 1; gatZ                                              | x |   |
| putative transport ATPase; yhiD                                                           | x | x |
| putative transport system permease protein; yhfT                                          | x |   |
| pyruvate dehydrogenase (decarboxylase component);<br>aceE                                 | x |   |
| serine hydroxymethyltransferase; glyA                                                     | x |   |
| sodium-calcium/proton antiporter; chaA                                                    | x | x |
| superoxide dismutase, iron; sodB                                                          | x |   |
| tagatose-bisphosphate aldolase 1; gatY                                                    | x | x |
| UDP-D-galactose:(glucosyl)lipopolysaccharide-1,6- D-<br>galactosyltransferase; rfaB       | x |   |

---

**Table S2.** Influence of presence absence of protective measures on overall spot intensity deviations for Array1 (unprotected vs. 1 mM PBS). *SS*: Sum of Squares, *df*: degrees of freedom, *MS*: Mean of Square Sums, *F*: F-value, *p*: p-value corresponding to *F*, *F<sub>crit</sub>*: critical *F* corresponding to chosen confidence interval ( $\alpha = 0.05$ )

| <b>Cy3 Single Dye</b>      |                    |           |                    |                    |                    |                         |
|----------------------------|--------------------|-----------|--------------------|--------------------|--------------------|-------------------------|
|                            | <i>groups</i>      | <i>n</i>  | <i>sum</i>         | <i>mean</i>        | <i>variance</i>    |                         |
|                            | no protection      | 10        | $7.68 \times 10^4$ | $7.68 \times 10^3$ | $4.42 \times 10^7$ |                         |
|                            | 1 mM PBS           | 15        | $1.43 \times 10^5$ | $9.58 \times 10^3$ | $105 \times 10^8$  |                         |
| <i>source of deviation</i> | <i>SS</i>          | <i>df</i> | <i>MS</i>          | <i>F</i>           | <i>p</i>           | <i>F<sub>crit</sub></i> |
| between groups             | $2.16 \times 10^7$ | 1         | $2.16 \times 10^7$ | 0.27               | 0.61               | 4.28                    |
| within groups              | $1.87 \times 10^9$ | 23        | $8.14 \times 10^7$ |                    |                    |                         |
| total                      | $1.89 \times 10^9$ | 24        |                    |                    |                    |                         |
| <b>Cy5 Single Dye</b>      |                    |           |                    |                    |                    |                         |
|                            | <i>groups</i>      | <i>n</i>  | <i>sum</i>         | <i>mean</i>        | <i>variance</i>    |                         |
|                            | no protection      | 10        | $7.58 \times 10^4$ | $7.58 \times 10^3$ | $1.10 \times 10^8$ |                         |
|                            | 1 mM PBS           | 15        | $9.55 \times 10^4$ | $6.37 \times 10^3$ | $6.68 \times 10^7$ |                         |
| <i>source of deviation</i> | <i>SS</i>          | <i>df</i> | <i>MS</i>          | <i>F</i>           | <i>p</i>           | <i>F<sub>crit</sub></i> |
| between groups             | $8.81 \times 10^6$ | 1         | $8.80 \times 10^6$ | 0.11               | 0.75               | 4.28                    |
| within groups              | $1.92 \times 10^9$ | 23        | $8.36 \times 10^7$ |                    |                    |                         |
| total                      | $1.93 \times 10^9$ | 24        |                    |                    |                    |                         |
| <b>Cy3 Two Dye</b>         |                    |           |                    |                    |                    |                         |
|                            | <i>groups</i>      | <i>n</i>  | <i>sum</i>         | <i>mean</i>        | <i>variance</i>    |                         |
|                            | no protection      | 10        | $8.50 \times 10^4$ | $8.50 \times 10^3$ | $2.68 \times 10^7$ |                         |
|                            | 1 mM PBS           | 15        | $2.04 \times 10^5$ | $1.36 \times 10^4$ | $1.87 \times 10^8$ |                         |
| <i>source of deviation</i> | <i>SS</i>          | <i>df</i> | <i>MS</i>          | <i>F</i>           | <i>p</i>           | <i>F<sub>crit</sub></i> |
| between groups             | $1.55 \times 10^8$ | 1         | $1.55 \times 10^8$ | 1.25               | 0.28               | 4.28                    |
| within groups              | $2.86 \times 10^9$ | 23        | $1.25 \times 10^8$ |                    |                    |                         |
| total                      | $3.02 \times 10^9$ | 24        |                    |                    |                    |                         |
| <b>Cy5 Two Dye</b>         |                    |           |                    |                    |                    |                         |
|                            | <i>groups</i>      | <i>n</i>  | <i>sum</i>         | <i>mean</i>        | <i>variance</i>    |                         |
|                            | no protection      | 10        | $2.68 \times 10^4$ | $2.68 \times 10^3$ | $7.15 \times 10^6$ |                         |
|                            | 1 mM PBS           | 15        | $8.08 \times 10^2$ | $5.39 \times 10^3$ | $4.69 \times 10^7$ |                         |
| <i>source of deviation</i> | <i>SS</i>          | <i>df</i> | <i>MS</i>          | <i>F</i>           | <i>p</i>           | <i>F<sub>crit</sub></i> |
| between groups             | $4.42 \times 10^7$ | 1         | $4.42 \times 10^7$ | 1.41               | 0.25               | 4.28                    |
| within groups              | $7.21 \times 10^8$ | 23        | $3.14 \times 10^7$ |                    |                    |                         |
| total                      | $7.66 \times 10^8$ | 24        |                    |                    |                    |                         |

**Table S3.** Influence of presence absence of protective measures on overall spot intensity deviations for Array2 (unprotected vs. 10 mM ROXS in 1 mM PBS). *SS*: Sum of Squares, *df*: degrees of freedom, *MS*: Mean of Square Sums, *F*: F-value, *p*: p-value corresponding to *F*, *F<sub>crit</sub>*: critical *F* corresponding to chosen confidence interval ( $\alpha = 0.05$ )

| <b>Cy3 Single Dye</b>      |                    |           |                    |                    |                    |                         |
|----------------------------|--------------------|-----------|--------------------|--------------------|--------------------|-------------------------|
|                            | <i>groups</i>      | <i>n</i>  | <i>sum</i>         | <i>mean</i>        | <i>variance</i>    |                         |
|                            | no protection      | 13        | $1.94 \times 10^5$ | $1.49 \times 10^4$ | $3.55 \times 10^8$ |                         |
|                            | 1 mM PBS           | 14        | $1.24 \times 10^5$ | $8.83 \times 10^3$ | $1.25 \times 10^8$ |                         |
| <i>source of deviation</i> | <i>SS</i>          | <i>df</i> | <i>MS</i>          | <i>F</i>           | <i>p</i>           | <i>F<sub>crit</sub></i> |
| between groups             | $2.49 \times 10^8$ | 1         | $2.49 \times 10^8$ | 1.06               | 0.31               | 4.24                    |
| within groups              | $5.89 \times 10^9$ | 25        | $2.35 \times 10^8$ |                    |                    |                         |
| total                      | $6.14 \times 10^9$ | 26        |                    |                    |                    |                         |
| <b>Cy5 Single Dye</b>      |                    |           |                    |                    |                    |                         |
|                            | <i>groups</i>      | <i>n</i>  | <i>sum</i>         | <i>mean</i>        | <i>variance</i>    |                         |
|                            | no protection      | 13        | $1.03 \times 10^5$ | $7.90 \times 10^3$ | $6.75 \times 10^7$ |                         |
|                            | 1 mM PBS           | 14        | $5.28 \times 10^4$ | $3.77 \times 10^3$ | $9.92 \times 10^6$ |                         |
| <i>source of deviation</i> | <i>SS</i>          | <i>df</i> | <i>MS</i>          | <i>F</i>           | <i>p</i>           | <i>F<sub>crit</sub></i> |
| between groups             | $1.15 \times 10^8$ | 1         | $1.15 \times 10^8$ | 3.05               | 0.09               | 4.24                    |
| within groups              | $9.39 \times 10^8$ | 25        | $3.76 \times 10^7$ |                    |                    |                         |
| total                      | $1.05 \times 10^9$ | 26        |                    |                    |                    |                         |
| <b>Cy3 Two Dye</b>         |                    |           |                    |                    |                    |                         |
|                            | <i>groups</i>      | <i>n</i>  | <i>sum</i>         | <i>mean</i>        | <i>variance</i>    |                         |
|                            | no protection      | 13        | $1.96 \times 10^5$ | $1.51 \times 10^4$ | $3.79 \times 10^8$ |                         |
|                            | 1 mM PBS           | 14        | $1.25 \times 10^5$ | $8.96 \times 10^3$ | $7.87 \times 10^7$ |                         |
| <i>source of deviation</i> | <i>SS</i>          | <i>df</i> | <i>MS</i>          | <i>F</i>           | <i>p</i>           | <i>F<sub>crit</sub></i> |
| between groups             | $2.54 \times 10^8$ | 1         | $2.54 \times 10^8$ | 1.14               | 0.30               | 4.24                    |
| within groups              | $5.57 \times 10^9$ | 25        | $2.23 \times 10^8$ |                    |                    |                         |
| total                      | $5.82 \times 10^9$ | 26        |                    |                    |                    |                         |
| <b>Cy5 Two Dye</b>         |                    |           |                    |                    |                    |                         |
|                            | <i>groups</i>      | <i>n</i>  | <i>sum</i>         | <i>mean</i>        | <i>variance</i>    |                         |
|                            | no protection      | 13        | $5.87 \times 10^4$ | $4.51 \times 10^3$ | $3.33 \times 10^7$ |                         |
|                            | 1 mM PBS           | 14        | $7.03 \times 10^4$ | $5.02 \times 10^3$ | $2.69 \times 10^7$ |                         |
| <i>source of deviation</i> | <i>SS</i>          | <i>df</i> | <i>MS</i>          | <i>F</i>           | <i>p</i>           | <i>F<sub>crit</sub></i> |
| between groups             | $1.75 \times 10^6$ | 1         | $1.75 \times 10^6$ | 0.06               | 0.81               | 4.24                    |
| within groups              | $7.48 \times 10^8$ | 25        | $2.99 \times 10^7$ |                    |                    |                         |
| total                      | $7.50 \times 10^8$ | 26        |                    |                    |                    |                         |

**Table S4.** Influence of presence absence of protective measures on overall spot intensity deviations for Array3 (unprotected vs. 50 mM ROXS in 1 mM PBS).

| <b>Cy3 Single Dye</b>      |                    |           |                    |                    |                    |                         |
|----------------------------|--------------------|-----------|--------------------|--------------------|--------------------|-------------------------|
|                            | <i>groups</i>      | <i>n</i>  | <i>sum</i>         | <i>mean</i>        | <i>variance</i>    |                         |
|                            | no protection      | 10        | $9.48 \times 10^4$ | $9.48 \times 10^3$ | $8.31 \times 10^7$ |                         |
|                            | 1 mM PBS           | 14        | $2.06 \times 10^5$ | $1.47 \times 10^4$ | $1.69 \times 10^8$ |                         |
| <i>source of deviation</i> | <i>SS</i>          | <i>df</i> | <i>MS</i>          | <i>F</i>           | <i>p</i>           | <i>F<sub>crit</sub></i> |
| between groups             | $1.61 \times 10^8$ | 1         | $1.61 \times 10^8$ | 1.20               | 0.29               | 4.30                    |
| within groups              | $2.95 \times 10^9$ | 22        | $1.33 \times 10^8$ |                    |                    |                         |
| total                      | $3.11 \times 10^9$ | 23        |                    |                    |                    |                         |
| <b>Cy5 Single Dye</b>      |                    |           |                    |                    |                    |                         |
|                            | <i>groups</i>      | <i>n</i>  | <i>sum</i>         | <i>mean</i>        | <i>variance</i>    |                         |
|                            | no protection      | 10        | $1.18 \times 10^5$ | $1.18 \times 10^4$ | $2.65 \times 10^8$ |                         |
|                            | 1 mM PBS           | 14        | $9.29 \times 10^4$ | $6.63 \times 10^3$ | $7.91 \times 10^7$ |                         |
| <i>source of deviation</i> | <i>SS</i>          | <i>df</i> | <i>MS</i>          | <i>F</i>           | <i>P</i>           | <i>F<sub>crit</sub></i> |
| between groups             | $1.55 \times 10^8$ | 1         | $1.55 \times 10^8$ | 1.00               | 0.33               | 4.30                    |
| within groups              | $3.41 \times 10^9$ | 22        | $1.55 \times 10^8$ |                    |                    |                         |
| total                      | $3.56 \times 10^9$ | 23        |                    |                    |                    |                         |
| <b>Cy3 Two Dye</b>         |                    |           |                    |                    |                    |                         |
|                            | <i>groups</i>      | <i>n</i>  | <i>sum</i>         | <i>mean</i>        | <i>variance</i>    |                         |
|                            | no protection      | 10        | $6.46 \times 10^4$ | $6.46 \times 10^3$ | $7.57 \times 10^7$ |                         |
|                            | 1 mM PBS           | 14        | $1.12 \times 10^5$ | $7.97 \times 10^3$ | $1.16 \times 10^8$ |                         |
| <i>source of deviation</i> | <i>SS</i>          | <i>Df</i> | <i>MS</i>          | <i>F</i>           | <i>P</i>           | <i>F<sub>crit</sub></i> |
| between groups             | $1.33 \times 10^7$ | 1         | $1.33 \times 10^7$ | 0.13               | 0.72               | 4.30                    |
| within groups              | $2.19 \times 10^9$ | 22        | $9.97 \times 10^7$ |                    |                    |                         |
| total                      | $2.21 \times 10^9$ | 23        |                    |                    |                    |                         |
| <b>Cy5 Two Dye</b>         |                    |           |                    |                    |                    |                         |
|                            | <i>groups</i>      | <i>n</i>  | <i>sum</i>         | <i>mean</i>        | <i>variance</i>    |                         |
|                            | no protection      | 10        | $7.39 \times 10^4$ | $7.39 \times 10^3$ | $5.42 \times 10^7$ |                         |
|                            | 1 mM PBS           | 14        | $2.17 \times 10^5$ | $1.55 \times 10^4$ | $2.19 \times 10^8$ |                         |
| <i>source of deviation</i> | <i>SS</i>          | <i>df</i> | <i>MS</i>          | <i>F</i>           | <i>p</i>           | <i>F<sub>crit</sub></i> |
| between groups             | $3.85 \times 10^8$ | 1         | $3.85 \times 10^8$ | 2.54               | 0.12               | 4.30                    |
| within groups              | $3.33 \times 10^9$ | 22        | $1.51 \times 10^8$ |                    |                    |                         |
| total                      | $3.72 \times 10^9$ | 23        |                    |                    |                    |                         |

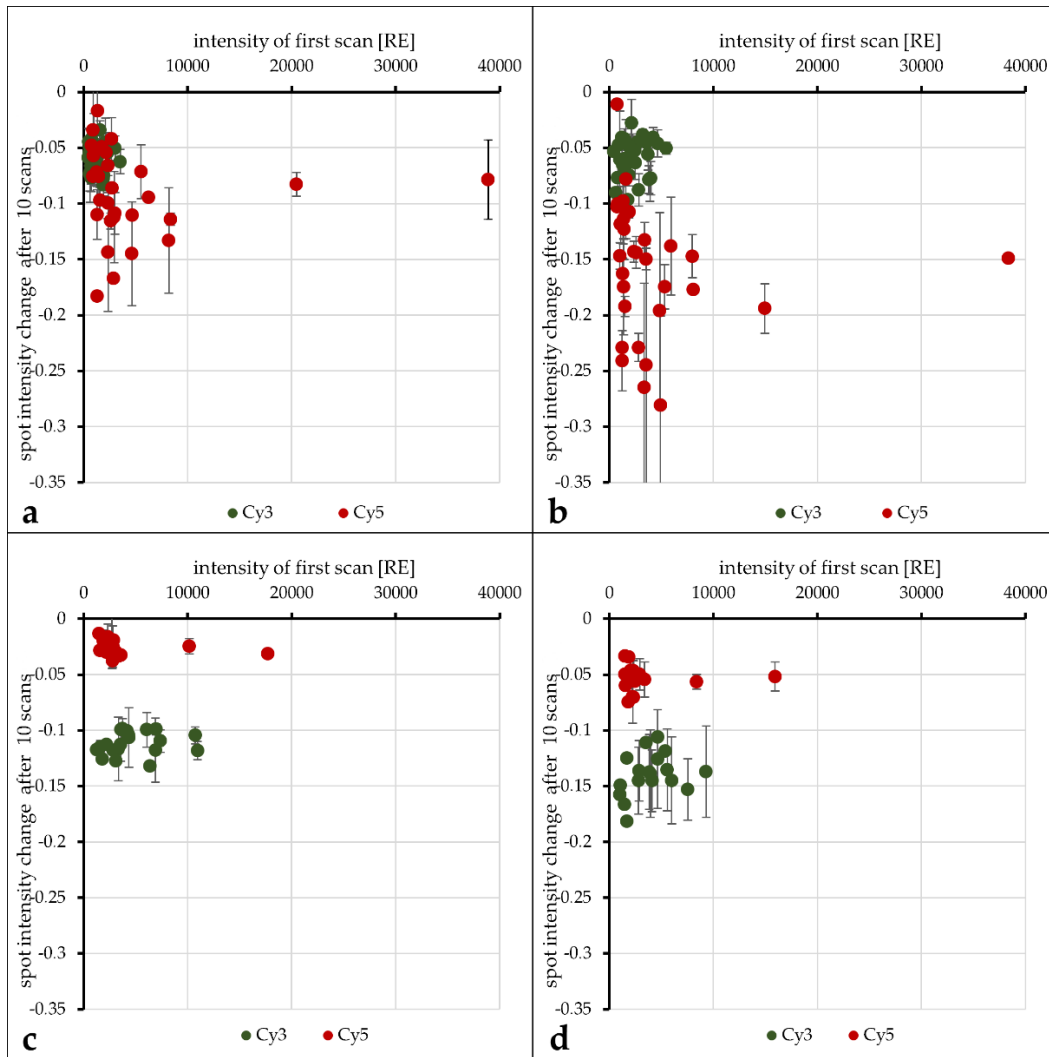

**Figure S1.** Influence of spot intensity level on spot intensity percent change after 10 scans. (a) unprotected single dye spots; (b) unprotected two dye spots; (c) 1 mM ROXS in 1 mM PBS protected single dye spots; (d) 1 mM ROXS in 1 mM PBS protected two dye spots. Error indicators are simple standard deviations.

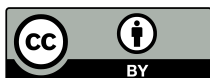

© 2016 by the authors; licensee MDPI, Basel, Switzerland. This article is an open access article distributed under the terms and conditions of the Creative Commons by Attribution (CC-BY) license (<http://creativecommons.org/licenses/by/4.0/>).
